# Supplementary material for: Association between gastric Candida colonization and surgical site infections after high-level hepatobiliary pancreatic surgeries: the results of prospective observational study
Source: Springer Nature journal article supplement (doi:10.1007/s00423-020-02006-7), 2020-10-15
Supplement: MOESM1 [file 18487490]

**Supplemental Table 1a. The influence of dose of proton pump inhibitor and H2 blocker on gastric candida colonization**

| <b>PPI</b>                  | <b>Group NGC with PPI<br/>(n=21)</b> | <b>Group GC with PPI<br/>(n=13)</b> | <b>p-value</b> |
|-----------------------------|--------------------------------------|-------------------------------------|----------------|
| High dosage/standard dosage | 12/9                                 | 6/7                                 | 0.533          |

  

| <b>H2 receptor blocker</b>  | <b>Group NGC with PPI<br/>(n=2)</b> | <b>Group GC with PPI<br/>(n=2)</b> | <b>p-value</b> |
|-----------------------------|-------------------------------------|------------------------------------|----------------|
| High dosage/standard dosage | 2/0                                 | 2/0                                | -              |

NGC: no gastric candida colonization, GC: gastric candida colonization, PPI: proton pump inhibitor, H2: histamine-2

**Supplemental Table 1b. The influence of chemotherapy regimen on gastric candida colonization**

| <b>Chemotherapy</b> | <b>Group NGC with chemotherapy<br/>(n=10)</b> | <b>Group GC with chemotherapy<br/>(n=6)</b> | <b>p-value</b> |
|---------------------|-----------------------------------------------|---------------------------------------------|----------------|
| GS/GC/Others        | 6/2/2                                         | 5/0/1                                       | 0.468          |

NGC: no gastric candida colonization, GC: gastric candida colonization, G: gemcitabine, GS: gemcitabine and S-1 combination therapy, GC: gemcitabine and cisplatin therapy

**Association between gastric candida colonization and surgical site infections after high-level hepatobiliary pancreatic surgeries: the results of prospective observational study.**

**“Langenbeck's Archives of Surgery”**

Kazuyuki Gyoten, Hiroyuki Kato, Aoi Hayasaki, Takehiro Fujii, Yusuke Iizawa, Yasuhiro Murata, Akihiro Tanemura, Naohisa Kuriyama, Masashi Kishiwada, Shugo Mizuno, Masanobu Usui, Hiroyuki Sakurai, Shuji Isaji. Department of Hepatobiliary Pancreatic and Transplant Surgery, Mie University School of Medicine, Tsu, Mie, Japan.

Corresponding author: Hiroyuki Kato, E-mail: katohiroyuki510719@gmail.com
